# Supplementary material for: PHF6 promotes non‐homologous end joining and G2 checkpoint recovery
Source: PubMed Central journal article supplement (PMC6944915; doi:10.15252/embr.201948460), 2019-11-29
Supplement: EMBR-21-e48460-s001.pdf [file EMBR-21-e48460-s001.pdf]

## Expanded View Figures

### Figure EV1. Effect of candidate proteins on viability in response to IR.

- A Positive control for Fig 2D. U2OS cells were mock depleted or depleted for Luc or PPM1D. Next, cells were synchronized in G2, irradiated, and fixed for immunofluorescence for  $\gamma$ H2AX after 0, 2, and 24 h. Scale bar is 20  $\mu$ m. From one experiment, four separate images with a total of at least 100 cells were analyzed for each knockdown. The quantification shows the number of  $\gamma$ H2AX foci per cell. In the box plots, the median with the first and third quartile is indicated, and the whiskers are drawn down to the 10<sup>th</sup> percentile and up to the 90<sup>th</sup>.
- B Positive control for Fig 2E. U2OS cells were mock depleted or depleted for Luc or Artemis. Next, cells were synchronized in G2, irradiated, and fixed for immunofluorescence for 53BP1 after 0, 2, and 24 h. Scale bar is 20  $\mu$ m. From one experiment, four separate images with a total of at least 100 cells were analyzed for each knockdown. The quantification shows the number of 53BP1 foci per cell. In the box plots, the median with the first and third quartile is indicated, and the whiskers are drawn down to the 10<sup>th</sup> percentile and up to the 90<sup>th</sup>.
- C RPE1 cells were depleted for p53 in combination with the individual candidates. Cells were left untreated or irradiated with 4 Gy and incubated for 10 days after which the colonies were analyzed. Experiments were performed in triplicate and two independent times. Error bars represent 95% confidence interval (CI).

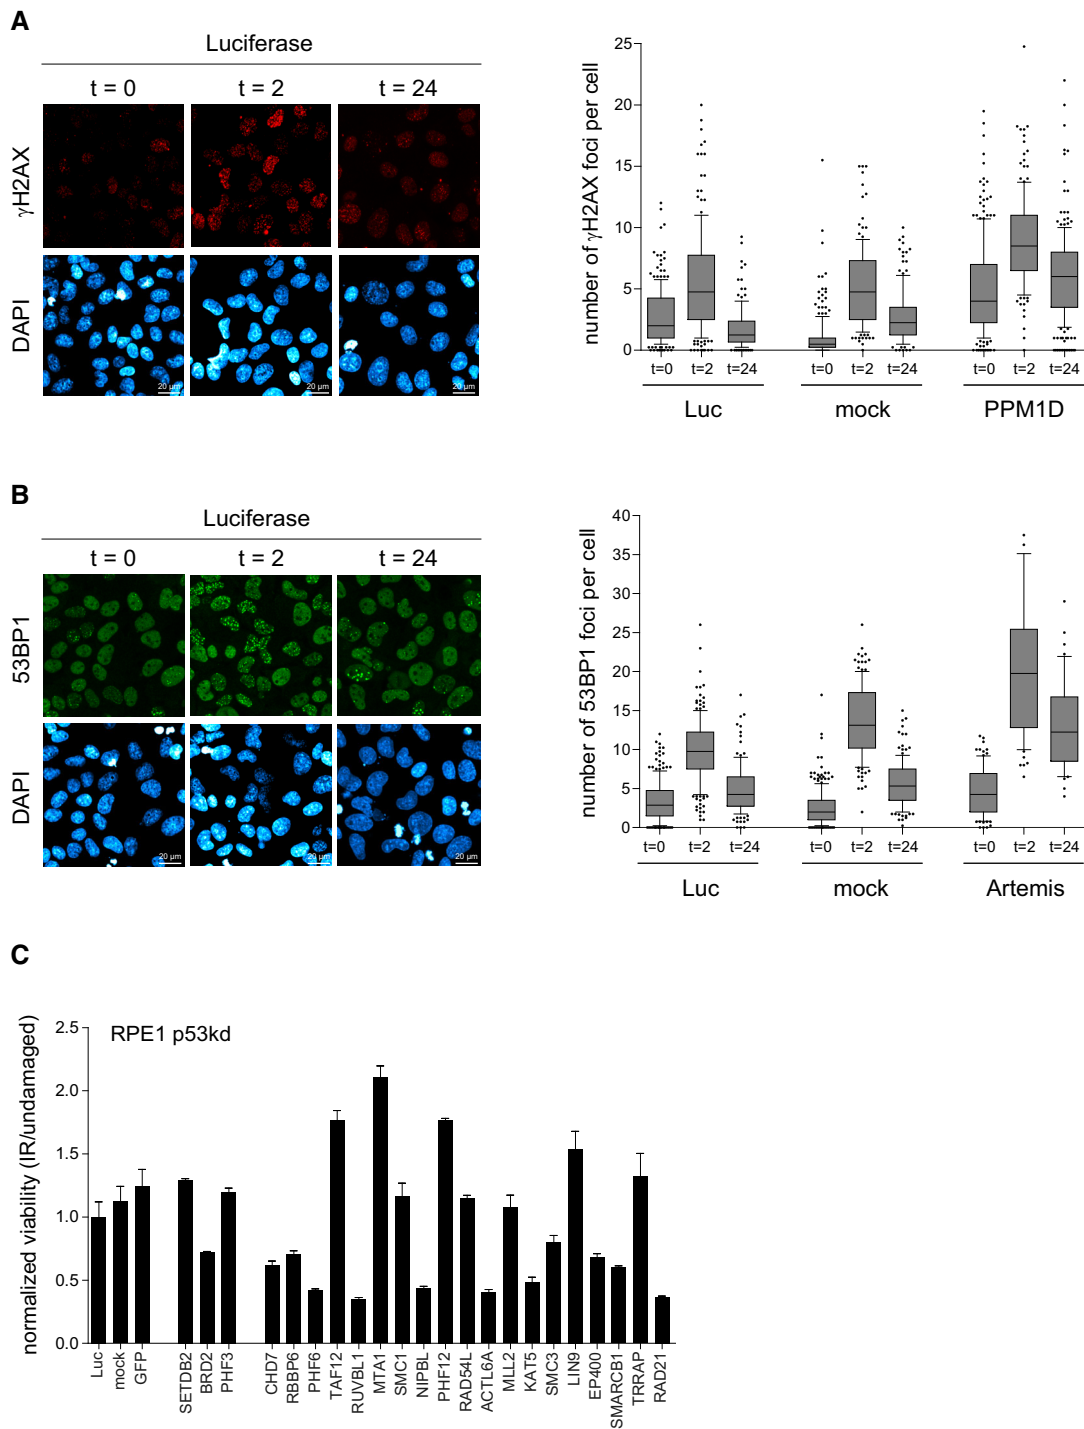

Figure EV1.

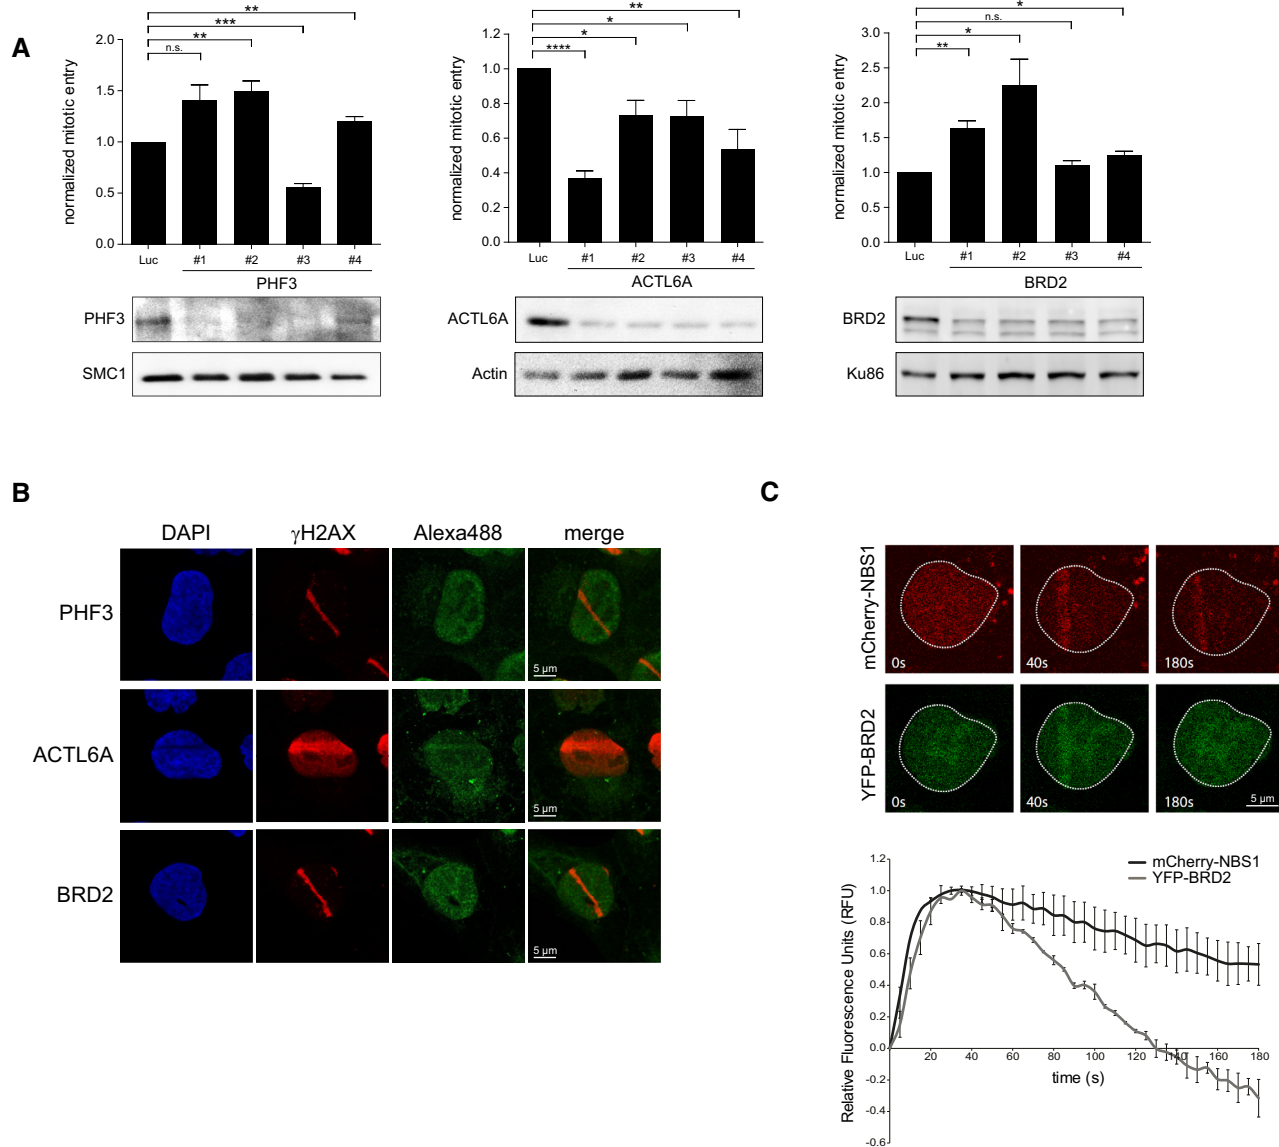

**Figure EV2. Characterization of PHF3, ACTL6A, and BRD2 in G2 checkpoint recovery.**

A U2OS cells were depleted for PHF3, BRD2, and ACTL6A and prepared for analysis by flow cytometry to determine checkpoint recovery (top panels) or lysed for Western blotting using the indicated antibodies (bottom panels). Error bars represent the SEM of three independent experiments. Statistical significance was determined using a two-tailed, unpaired *t*-test (\**P* < 0.05, \*\**P* < 0.01, \*\*\**P* < 0.001, \*\*\*\**P* < 0.0001).

B U2OS cells were locally irradiated using a 405nm laser and fixed directly thereafter for immunofluorescence. Alexa 488 represents PHF3, ACTL6A, or BRD2 staining. Scale bar is 5  $\mu$ m.

C U2OS cells expressing YFP-BRD2 and mCherry-NBS1 were locally irradiated and followed by time-lapse imaging. Graph shows the quantifications of at least 30 cells analyzed in three individual experiments, and error bars represent the SD. Scale bar is 5  $\mu$ m.

**Figure EV3. PHF6 knockout cells display a similar phenotype as cells depleted for PHF6.**

- A, B RPE1 cells were depleted of PHF6 using four different siRNA oligonucleotides. Checkpoint recovery after 5 Gy was analyzed by staining for MPM2 and flow cytometry (A), or cells were lysed and analyzed using Western blotting with the indicated antibodies (B). Error bars represent the SEM of three independent experiments. Statistical significance was determined using a two-tailed, unpaired *t*-test ( $***P < 0.001$ ,  $****P < 0.0001$ ).
- C U2OS WT and three different PHF6 knockout clones were lysed and analyzed by Western blotting with the indicated antibodies.
- D U2OS WT and PHF6 knockout cells were irradiated at 2 Gy and fixed for immunofluorescence at 0, 1, and 16 h. Samples were stained with the indicated antibodies. Scale bar is 10  $\mu\text{m}$ .
- E Quantification of number of 53BP1 IRIF per cell of (D) in which the error bars represent the SD of three independent experiments. Statistical significance was determined using a two-tailed, unpaired *t*-test ( $**P < 0.01$ ,  $****P < 0.0001$ ).
- F U2OS cells were depleted of PHF6 with three different siRNA oligonucleotides. Cells were fixed, stained with propidium iodide, and analyzed by flow cytometry. Cell cycle distribution was determined using Flowlogic software. Error bars represent the SD of three independent experiments.
- G U2OS WT and two different PHF6 knockout cell lines were fixed, stained with propidium iodide, and analyzed by flow cytometry. Cell cycle distribution was determined using Flowlogic software. Error bars represent the SD of three independent experiments.

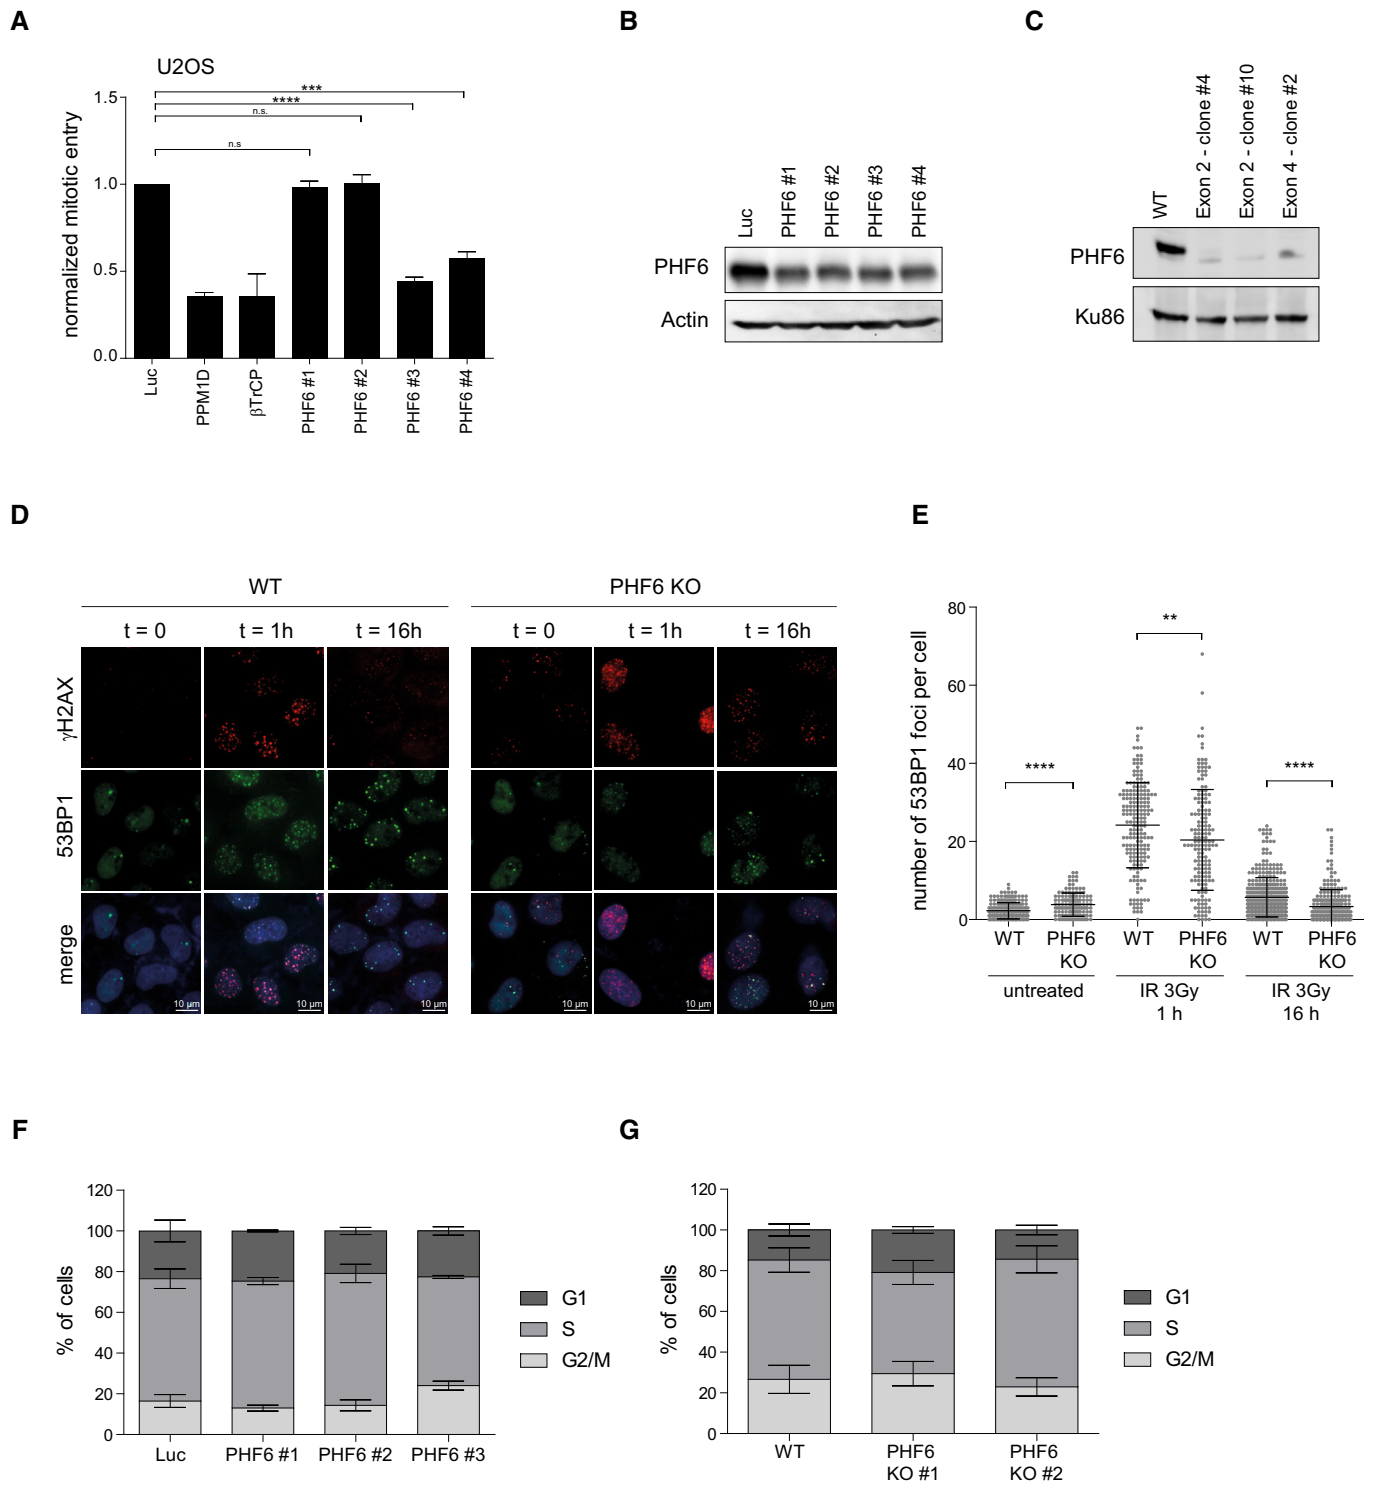

Figure EV3.

**Figure EV4. PHD domains required for checkpoint recovery function of PHF6.**

- A Graphical explanation of the PHD domains in PHF6 and the PHD1 and PHD2 deletion mutants ( $\Delta$ PHD1 and  $\Delta$ PHD2) generated for these studies.
- B U2OS PHF6 knockout (KO) cells complemented with GFP-PHF6 wild type (GFP-PHF6 WT) or mutants lacking either the PHD1 (GFP-PHF6  $\Delta$ PHD1) or PHD2 (GFP-PHF6  $\Delta$ PHD2) domain were lysed and analyzed using Western blotting with the indicated antibodies.
- C–E U2OS WT, PHF6 KO, or PHF6 KO cells complemented with GFP-PHF6 WT, GFP-PHF6  $\Delta$ PHD1, or GFP-PHF6  $\Delta$ PHD2 were irradiated using 3 Gy of IR and fixed after 1 h (C, D) or 24 h (E) for immunofluorescence. Presented is the number of  $\gamma$ H2AX (C, E) or 53BP1 (D) foci per cell. Error bars represent the SD of three independent experiments. Statistical significance was determined using a two-tailed, unpaired *t*-test (\**P* < 0.05, \*\**P* < 0.01, \*\*\*\**P* < 0.0001).
- F U2OS WT, PHF6 KO, and PHF6 KO cells transfected with GFP-PHF6 WT, GFP-PHF6  $\Delta$ PHD1, or GFP-PHF6  $\Delta$ PHD2 were synchronized in G2, treated with etoposide (3  $\mu$ M) for 1 h and then with nocodazole for 16 h. Subsequent recovery was analyzed by flow cytometry with MPM2 staining. Error bars represent the SEM of five independent experiments. Statistical significance was determined using a two-tailed, unpaired *t*-test (\**P* < 0.05, \*\*\*\**P* < 0.0001).

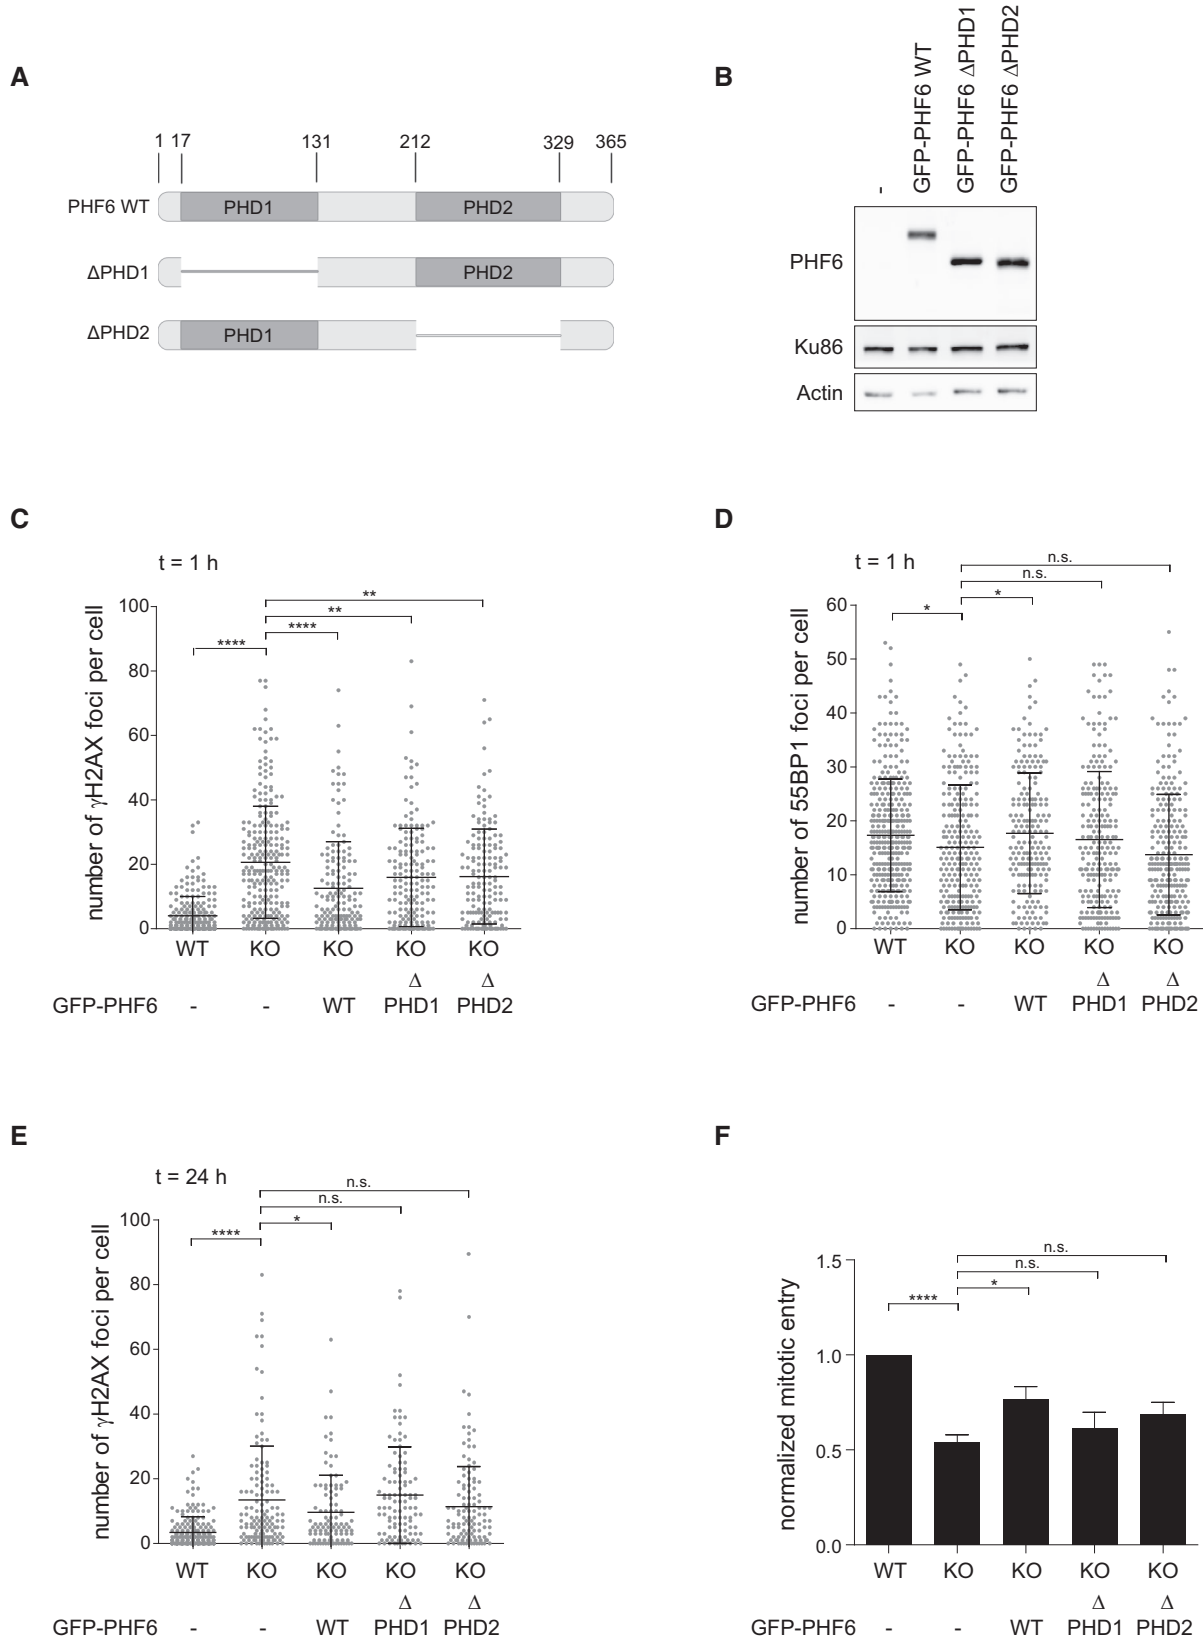

Figure EV4.

**Figure EV5. PHF6 controls classical NHEJ.**

- A, B U2OS cells expressing GFP-PHF6 and mCherry-NBS1 were locally irradiated in the absence and presence of ATM and ATR inhibitors. Shown is the recruitment of GFP-PHF6 (A) or mCherry-NBS1 (B) to laser-induced breaks in time. At least 30 cells were analyzed in three individual experiments, and error bars represent the SD.
- C U2OS-DR cells containing the I-SceI HR reporter were transfected with the indicated siRNA oligos and I-SceI. 48 h later, the cells were fixed and analyzed by flow cytometry. Represented is the relative repair efficiency as compared to the Luciferase control. Error bars represent the SEM of three independent experiments. Statistical significance was determined using a two-tailed, unpaired *t*-test (\*\**P* < 0.01, \*\*\**P* < 0.001, \*\*\*\**P* < 0.0001).
- D U2OS cells depleted of PHF6 with three different siRNA oligonucleotides and U2OS WT and PHF6 knockout cells were lysed and analyzed using Western blotting with the indicated antibodies.
- E U2OS WT and PHF6 knockout cells transfected with siRNA oligos against Luciferase or XRCC4 were lysed and analyzed using Western blotting with the indicated antibodies. The remaining PHF6 signal in the PHF6 KO sample is likely due to a cross reaction at similar height as PHF6 (also see Fig EV3C).
- F, G Distribution of the deletion sizes (F) or the extent of microhomology for the category simple deletions (G) obtained from independently obtained I-SceI repair events (described in Fig 4E) in the indicated samples.



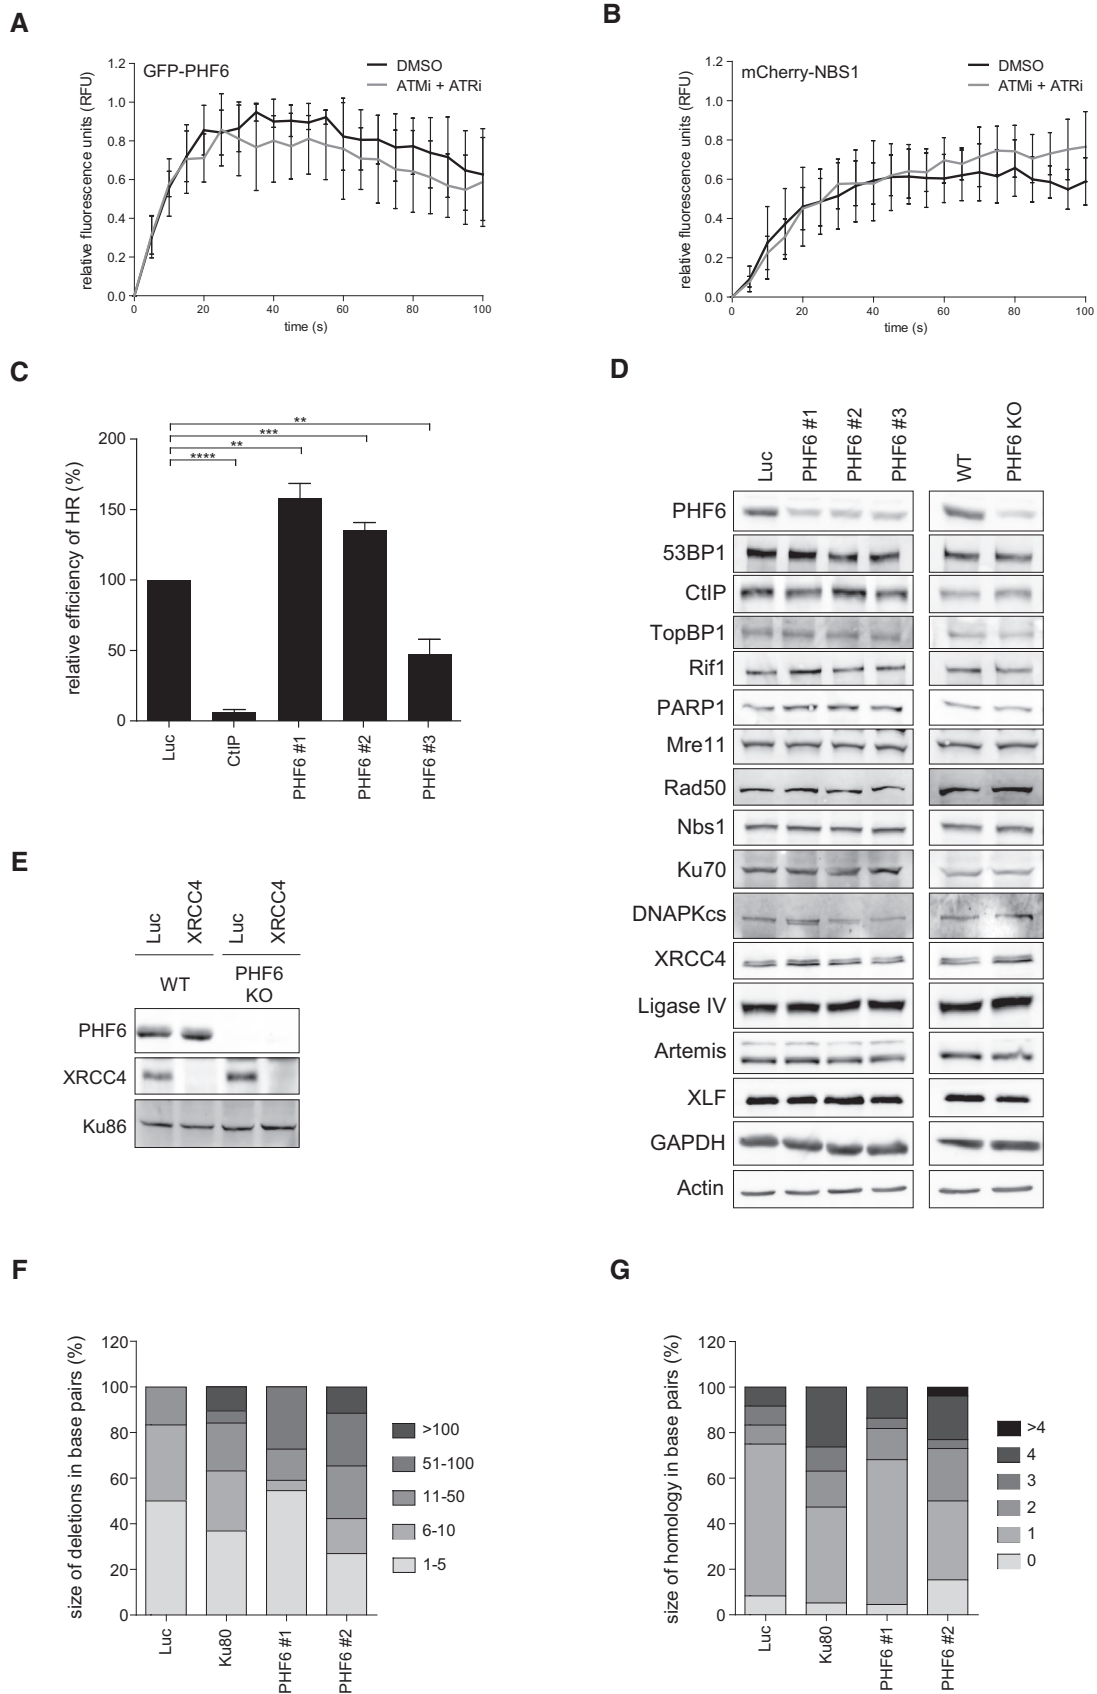

Figure EV5.
